# Supplementary material for: Global mpox lineage discovery and rapid outbreak tracking with nanopore sequencing
Source: Springer Nature journal article supplement (doi:10.1186/s12985-023-02059-2), 2023-05-06
Supplement: MOESM1 [file 25327752]

# Supplementary Data

## **Global Mpox Lineage Discovery and Rapid Outbreak Tracking with Nanopore Sequencing**

Michael S. Bosmeny<sup>1</sup>, Adam A. White<sup>1,†</sup>, Adrian A. Pater<sup>2,†</sup>, Jennifer Crew<sup>3</sup>, Joshua Geltz<sup>3</sup>, and Keith T. Gagnon<sup>1,2,\*</sup>

<sup>1</sup> Department of Biochemistry and Molecular Biology, Southern Illinois University School of Medicine, Carbondale, IL, USA.

<sup>2</sup> Department of Chemistry and Biochemistry, Southern Illinois University, Carbondale, IL, USA.

<sup>3</sup> Illinois Department of Public Health, Springfield, IL, USA.

<sup>†</sup> These authors contributed equally.

\* Corresponding Author: [ktgagnon@siu.edu](mailto:ktgagnon@siu.edu)

## Supplementary Figures

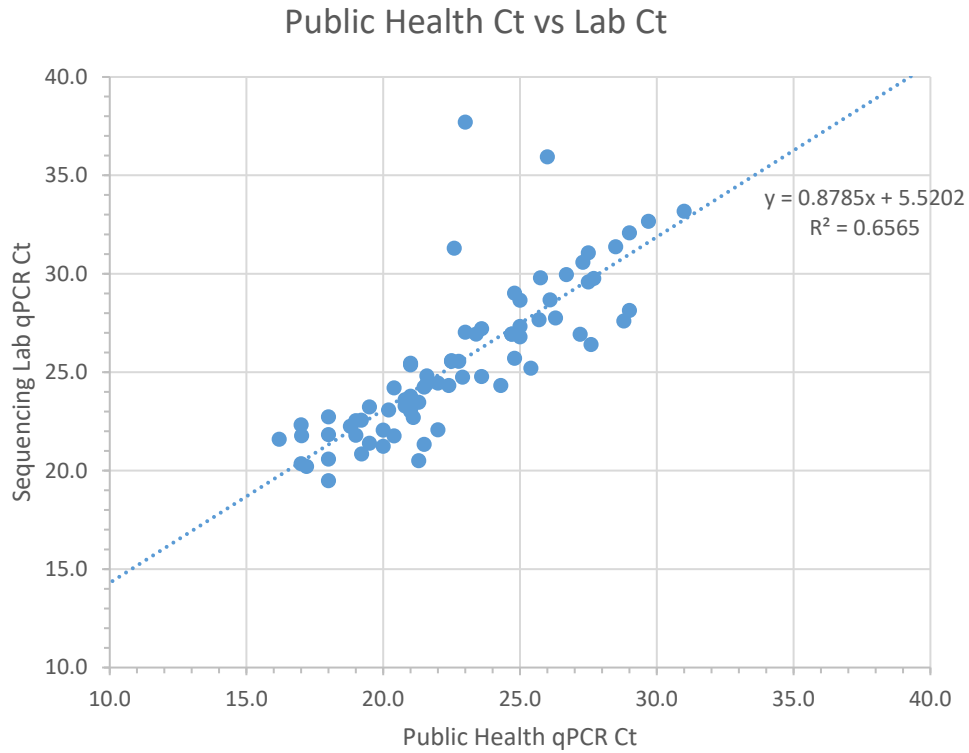

**Supplementary Figure S1:** Comparison of qPCR Ct values from Illinois Department of Public Health and those generated using OPG123 qPCR probes.

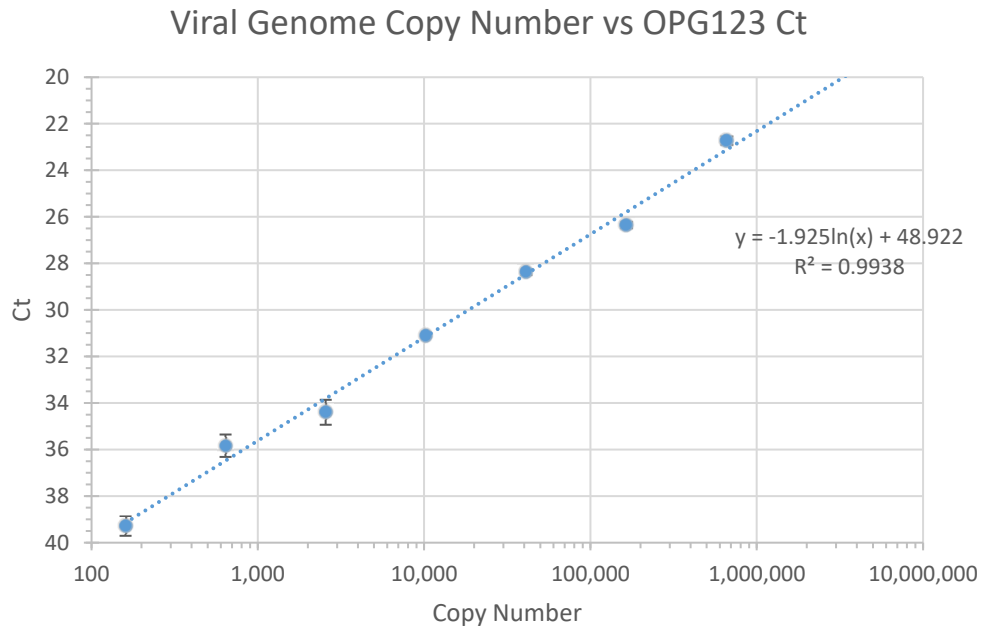

**Supplementary Figure S2:** Comparison of number of copies of a DNA gBlock and the qPCR Ct values generated from them using the OPG123 qPCR probe set.

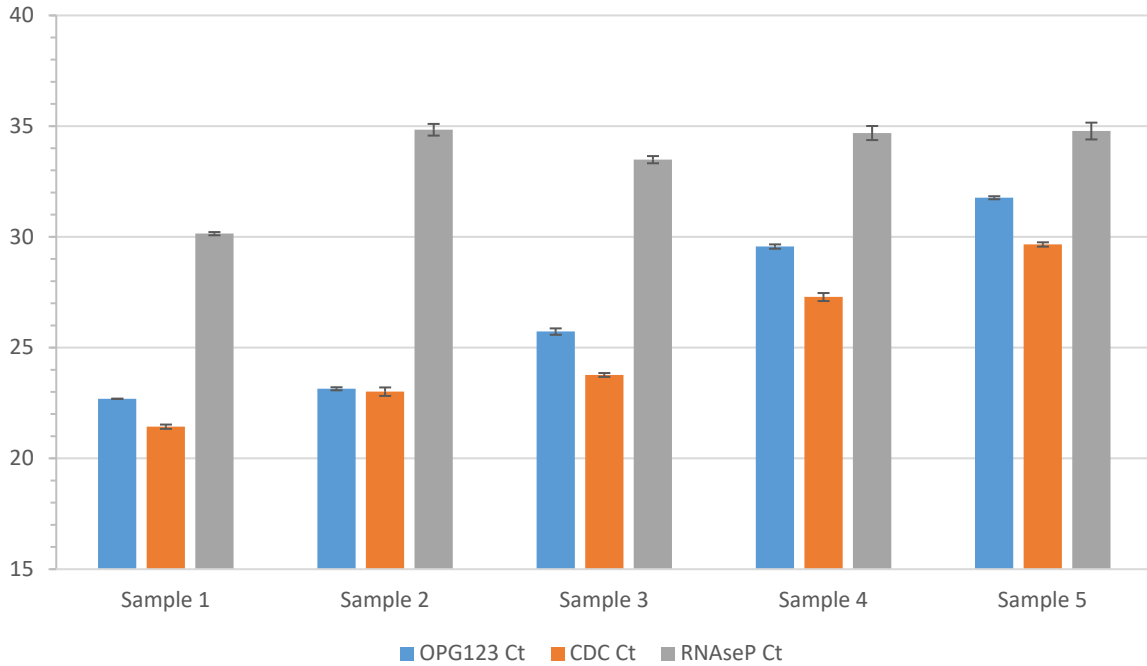

**Supplementary Figure S3:** Ct values for five different mpox samples, using three different qPCR probes. Each sample/probe combination was replicated three times.

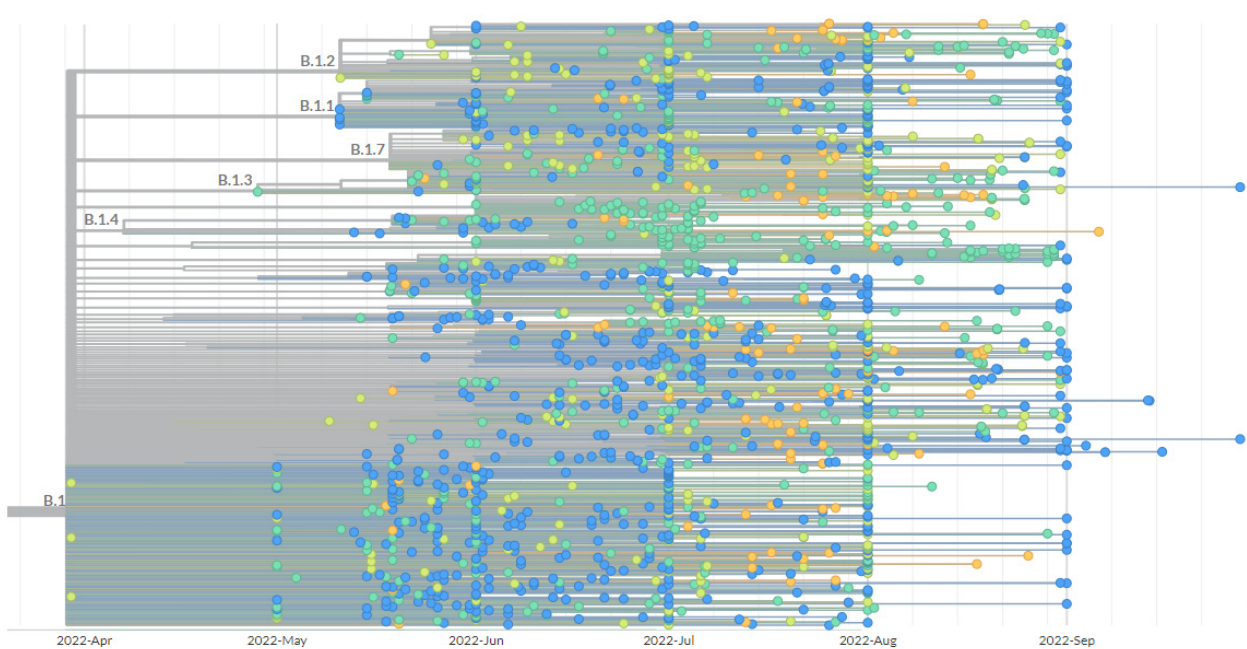

**Supplementary Figure S4:** Phylogenetic tree showing Clade IIb, Lineage B.1 mpox sequences. Color of each sequence indicates status of indicated deletion starting at base 179077. Teal: no deletion. Lime-green: Deletion to base 179094 (17 bases removed). Blue: Deletion to base 179148 (71 bases removed). Orange: Deletion to base 179175 (98 bases removed). Each lineage follows no clear pattern in deletions, indicating this could be an artifact of sequencing method, rather than actual deletion.

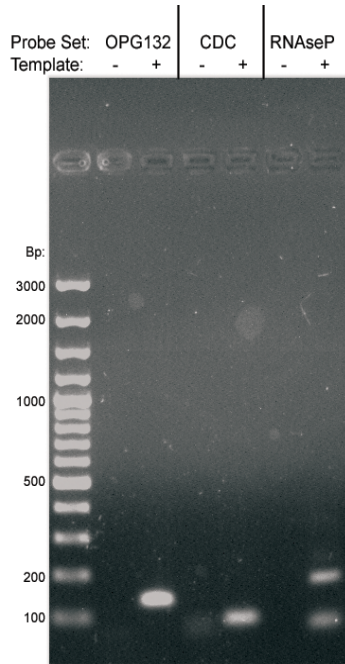

**Supplementary Figure S5:** 1% agarose gel showing the positive and negative control results for three qPCR probe sets. Ladder size markers are shown on the left.

| Template: | IDPH-22 |   | IDPH-42 |   | IDPH-52 |   | No template |   |
|-----------|---------|---|---------|---|---------|---|-------------|---|
| Pool:     | 1       | 2 | 1       | 2 | 1       | 2 | 1           | 2 |
| Coverage: | 99.74%  |   | 99.42%  |   | 99.95%  |   | -           |   |

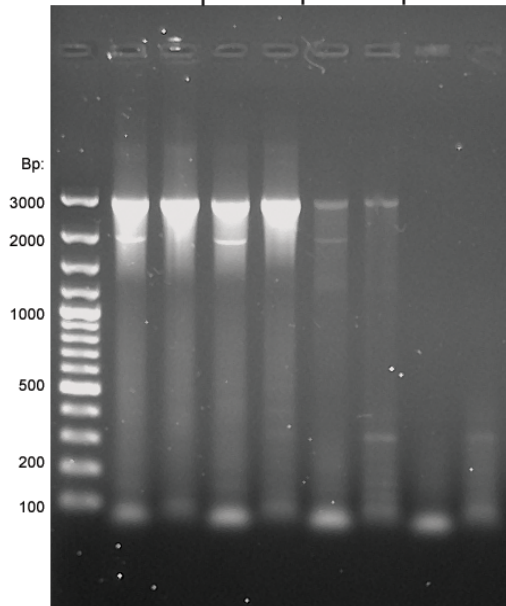

**Supplementary Figure S6:** 1% agarose gel showing three randomly-selected multiplex PCR samples, along with a negative control (no template). Final sequence coverage of each sample is also shown. Ladder size markers are shown on the left.
